# Supplementary material
Source: HighWire-hosted journal article supplement (https://www.annfammed.org/highwire/filestream/7390/field_highwire_adjunct_files/0/Campbell_App.pdf)
Supplement: Campbell_App.pdf [file Campbell_App.pdf]

**Online Supplementary Material**

Campbell SM, McDonald R, Lester H. The experience of pay-for-performance in English family practice: a qualitative study. *Ann Fam Med.* 2008;6(3):228-234.

<http://www.annfammed.org/cgi/content/full/6/3/228/DC1>

---

**Supplemental Appendix. Interview Topic Guide**

1. What does it mean to you to be a GP/nurse?
  - Any change in views since 2004
  - Views on what it might mean in future to be a GP/nurse
  
2. Has the way you spend your clinical time changed since the introduction of the new contract/Quality and Outcomes Framework?
  - Any change in hours of work?
  - Any change in personal consulting style in the consultation
  - Views on changes to out of hours responsibilities pre and post new contract
  
3. Has the way the practice is run changed at all since the introduction of Quality and Outcomes Framework?
  - Any changes in own role?
  - Any changes within the wider primary care team e.g. employing new staff/different types of staff
  - How has your practice used the extra income generated by Quality and Outcomes Framework?
  - Any changes in appointment systems or information technology?
  - Any changes in practice values or priorities for physician partners?
  
4. Have you noticed any changes in the way patients are using or view the surgery?
  
5. What do you think the net effect of Quality and Outcomes Framework has been on you and on general practice?

---

GP = general practitioner.
